# Supplementary material
Source: HighWire-hosted journal article supplement (https://bmjopen.bmj.com/content/9/6/e028949)
Supplement: inline-supplementary-material-1 [file inline-supplementary-material-1.pdf]

## Supplementary File 1. Search Strategy

((“Patient Admission”[majr] OR “Hospitals/utilization”[majr] OR “Hospital Departments/utilization”[majr] OR “Hospitalization”[majr]) AND (“Socioeconomic Factors”[majr] OR “Social Determinants of Health”[majr] OR “Sociological Factors”[majr] OR “Social Problems”[majr] OR “Social Conditions”[majr] OR “Social Change”[majr] OR “Social Class”[majr] OR “Social Environment”[majr] OR “Health Services Accessibility”[majr] OR “Family Characteristics”[majr] OR “Psychosocial Support Systems”[majr] OR “Food Supply”[majr] OR “Food Assistance”[majr] OR “Malnutrition”[majr] OR “Deficiency Diseases”[majr] OR “Homeless Persons”[majr] OR “Housing”[majr] OR “Poverty”[majr] OR “Working Poor”[majr] OR “Income”[majr] OR “Unemployment”[majr] OR “Employment”[majr] OR “Return to Work”[majr] OR “Health Status”[majr] OR “Stress, Psychological”[majr] OR “Crime Victims”[majr] OR “Social Discrimination”[majr] OR “Vulnerable Populations”[majr] OR “Disabled Persons”[majr] OR “Insurance Coverage”[majr] OR “Medical Indigency”[majr] OR “Medically Uninsured”[majr] OR “Literacy”[majr] OR “Health Literacy”[majr] OR “Educational Status”[majr] OR “Health Risk Behaviors”[majr] OR “Comorbidity”[majr]) AND adult[mh]) OR ((“patient admission”[ti] OR “patient admissions”[ti] OR “hospital utilization”[ti] OR “hospital department”[ti] OR “hospital departments”[ti] OR hospitalization[ti]) AND (“socioeconomic factor”[ti] OR “socioeconomic factors”[ti] OR “social determinants of health”[ti] OR “sociological factor”[ti] OR “sociological factors”[ti] OR “social problem”[ti] OR “social problems”[ti] OR “social condition”[ti] OR “social conditions”[ti] OR “social conditioning”[ti] OR “social change”[ti] OR “social changes”[ti] OR “social class”[ti] OR “social environment”[ti] OR “health services accessibility”[ti] OR “family characteristic”[ti] OR “family characteristics”[ti] OR “psychosocial support systems”[tiab] OR “psychosocial

support"[ti] OR "food supply"[ti] OR "food supplies"[ti] OR "food insecurity"[ti] OR "food  
insecurities"[ti] OR "food security"[ti] OR "food assistance"[ti] OR malnutrition[ti] OR  
"deficiency diseases"[ti] OR "homeless persons"[ti] OR homeless[ti] OR homelessness[ti] OR  
poverty[ti] OR poor[ti] OR "working poor"[ti] OR housing[ti] OR income[ti] OR  
unemployment[ti] OR employment[ti] OR "return to work"[ti] OR "health status"[ti] OR  
stress[ti] OR "crime victim"[ti] OR "crime victims"[ti] OR (crime[ti] victim[ti]) OR (crime[ti]  
victims[ti]) OR discriminat\*[ti] OR "vulnerable populations"[ti] OR vulnerabl\*[ti] OR  
vulnerabil\*[ti] OR disabled[ti] OR ((disabled[ti] OR disabilit\*[ti]) AND (people[ti] or  
persons[ti])) OR "insurance coverage"[ti] OR "medical indigency"[ti] OR indigent\*[ti] OR  
uninsured[ti] OR literacy[ti] OR "health literacy"[ti] OR "educational status"[ti] OR  
education\*[ti] OR "health risk behaviors"[ti] OR "risky behavior"[ti] OR "risky behaviors"[ti]  
OR comorbidity[ti] OR comorbid[ti]) AND 2017:2018[dp]) AND English[la]
